# Supplementary material for: RETRACTED ARTICLE: Re-engineered BCG overexpressing cyclic di-AMP augments trained immunity and exhibits improved efficacy against bladder cancer
Source: PubMed Central journal article supplement (PMC8847416; doi:10.1038/s41467-022-28509-z), 2022-02-15
Supplement: 41467_2022_28509_MOESM1_ESM.pdf [file 41467_2022_28509_MOESM1_ESM.pdf]

## Supplementary Figure. 1

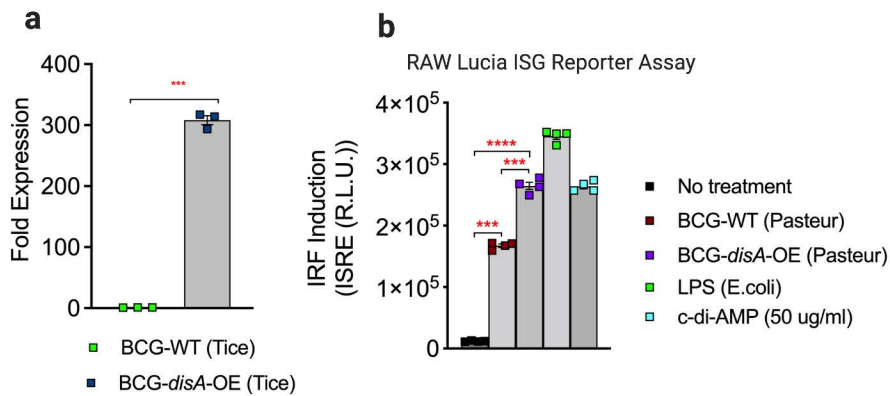

**Supplementary Figure 1. Confirmation of *M.tb-disA* overexpression BCG-*disA*-OE and induction of IRF signaling. a.** mRNA level of *disA* in log-phase BCG cultures relative to *M. tuberculosis sigA* (Rv2703) (n= 3 independent biological replicates). **b.** IRF3 induction measured in RAW-Lucia ISG reporter macrophages. IRF quantification was carried out in culture supernatant of macrophages infected at a MOI of 20:1 for 24 hr (n= 4 independent biological replicates). Data are presented as mean values ± S.E.M. Statistical analyses done using 2-tailed Student's t-test (\*\*\* P < 0.001, \*\*\*\* P < 0.0001).

## Supplementary Figure. 2

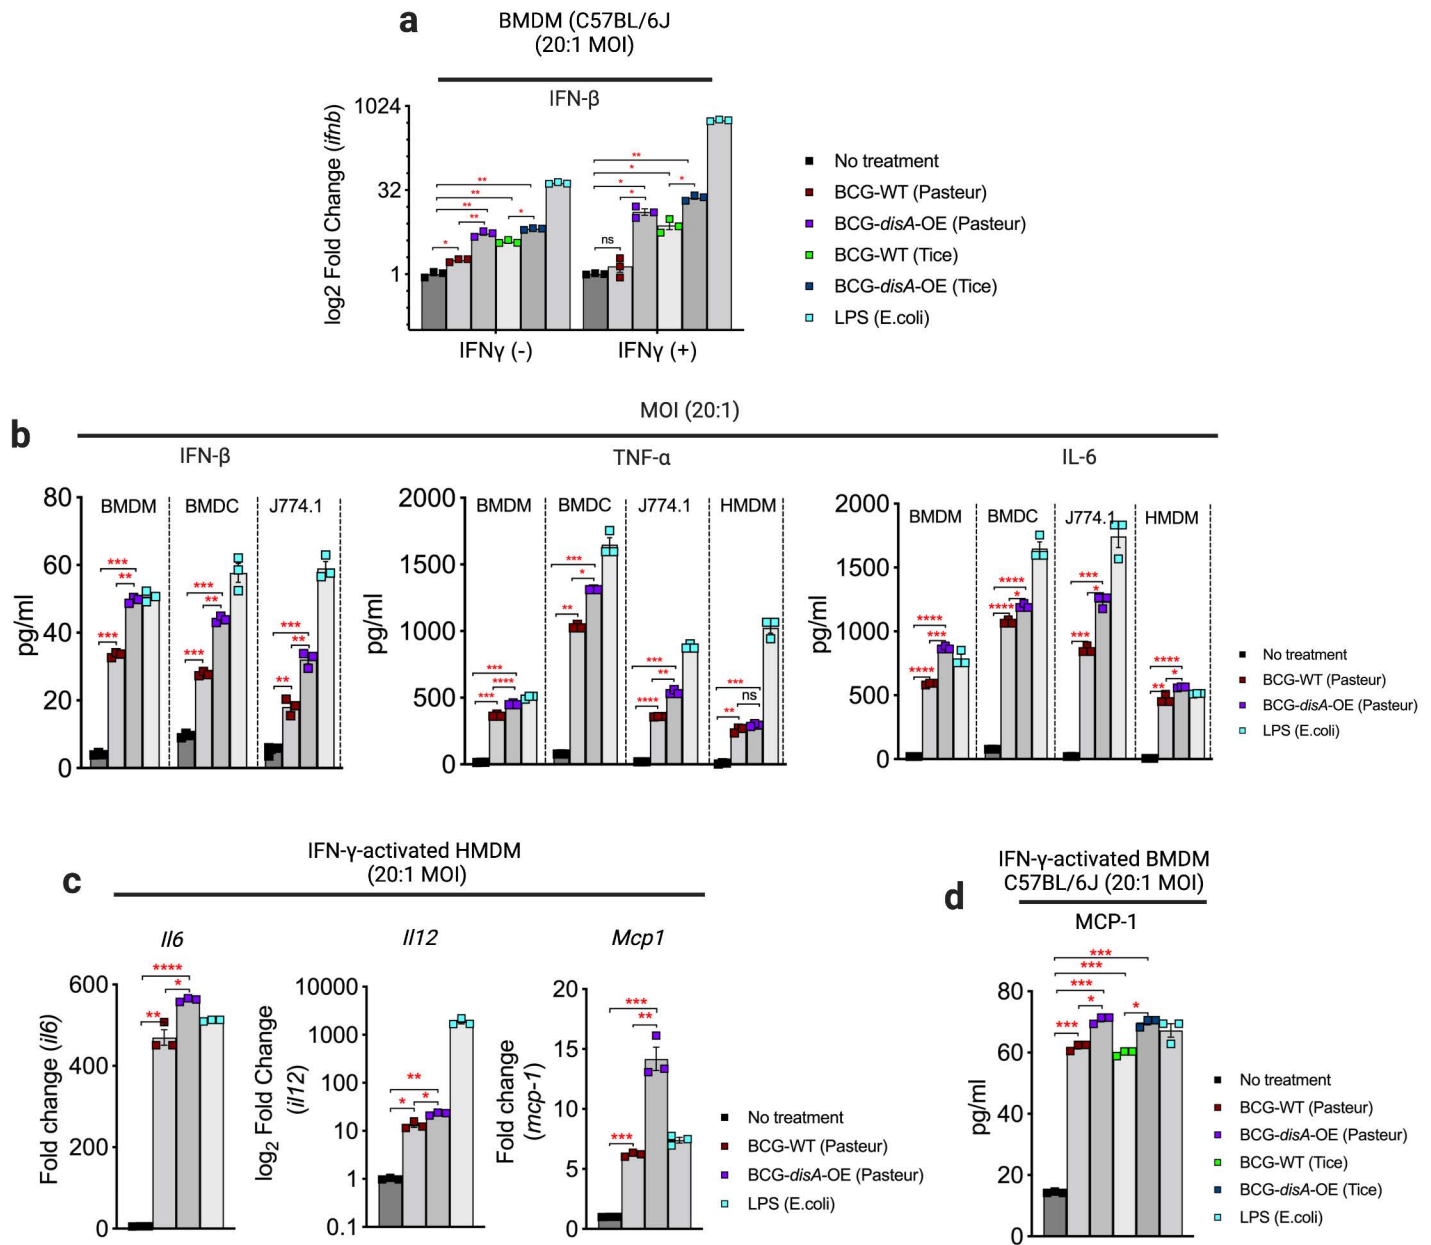

**Supplementary Figure 2. BCG-*disA*-OE elicits stronger IFN- $\beta$ , pro-inflammatory cytokines and chemokines than BCG-WT in primary human and murine macrophages and dendritic cells.** **a.** IFN- $\beta$  levels in resting and IFN- $\gamma$  primed BMDMs. **b.** IFN- $\beta$ , TNF- $\alpha$ , and IL-6 levels in human and murine primary macrophages, murine primary dendritic cells and J774.1 murine macrophage cell line. **c.** mRNA levels of *Il6*, *Il12* and *Mcp1* in IFN- $\gamma$  primary human macrophages relative to  $\beta$ -actin. **d.** MCP-1 levels in IFN- $\gamma$  primed murine primary macrophages. Cytokines and chemokine levels were measured by ELISA after 24 hr exposures at a MOI of 20:1. Data are presented as mean values  $\pm$  S.E.M ( $n = 3$  independent biological replicate experiments). Gene expression analyses of cytokines and chemokines was done after 6 hr exposure. Statistical analyses done using 2-tailed Student's t-test; (\*  $P < 0.05$ , \*\*  $P < 0.01$ , \*\*\*  $P < 0.001$ , \*\*\*\*  $P < 0.0001$ ).

### Supplementary Figure.3

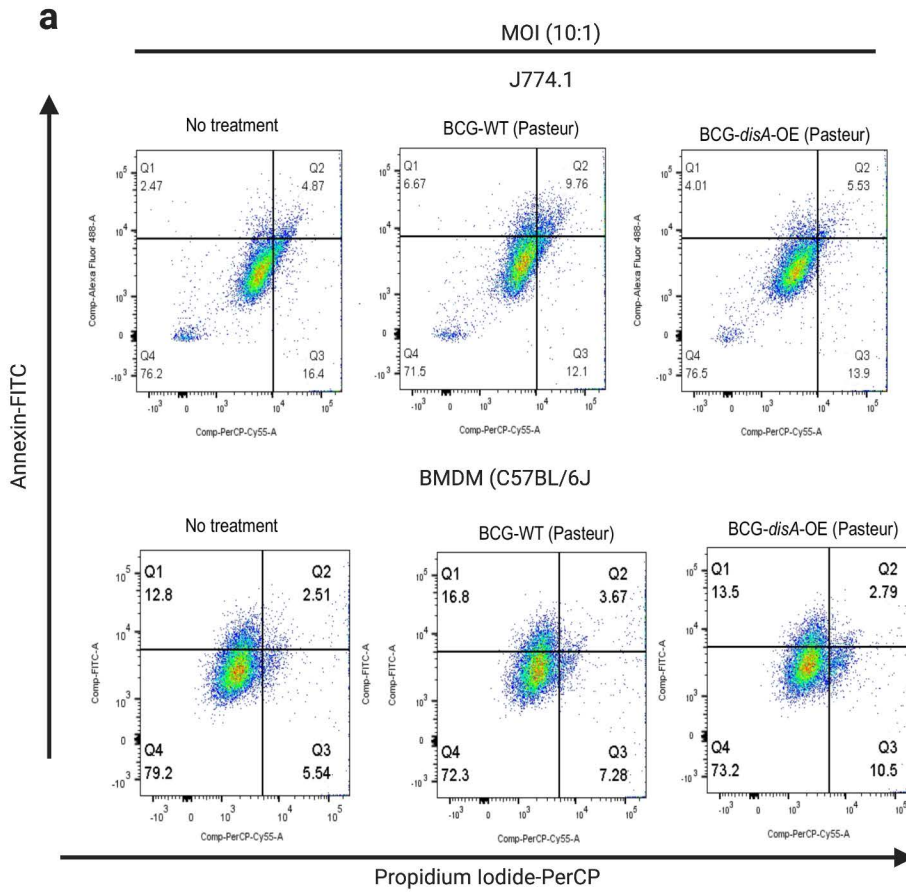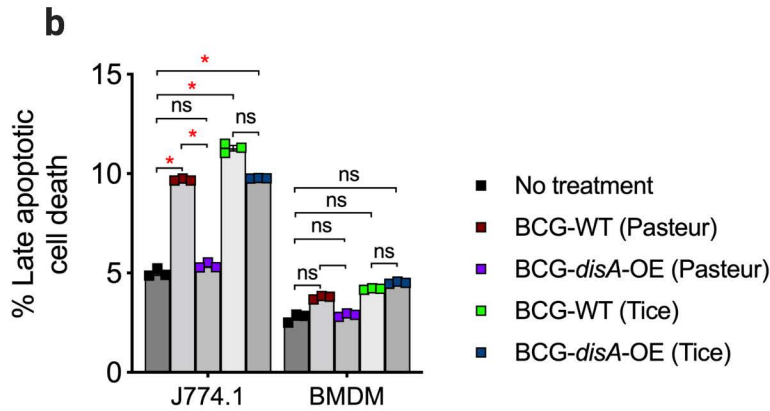

**Supplementary Figure 3. BCG-*disA*-OE is less toxic to macrophages than that of WT-BCG. a-b.** Percentage late apoptotic murine primary macrophages and J774.1 macrophage cell line. Data was collected after 24 hr exposure at a MOI of 20:1 as determined by flow cytometry. Data are presented as mean values  $\pm$  S.E.M. ( $n = 3$  independent biological replicate experiments). Statistical analysis done using 2-tailed Student's t-test (\*  $P < 0.05$ ).

## Supplementary Figure. 4

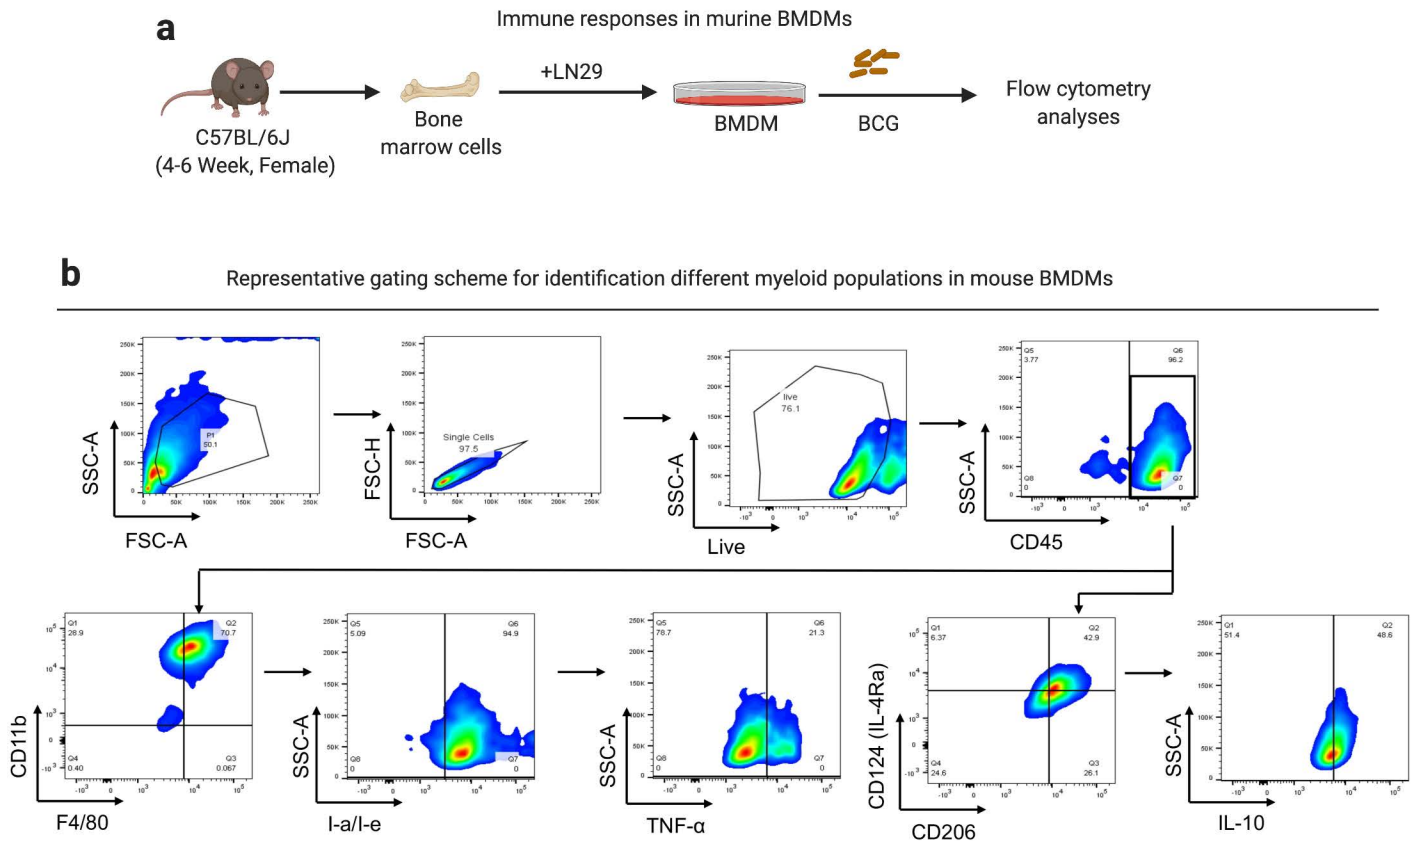

**Supplementary Figure 4. Representative gating scheme for identification of different myeloid populations in mouse BMDMs.** **a.** Schematic of generation of BMDMs. **b.** Representative gating scheme for identification of different myeloid cells. Briefly, leukocyte lineage was selected by gating SSC-A against CD45<sup>+</sup> populations on live cells. CD11b<sup>+</sup>F4/80<sup>+</sup> macrophages were identified out of CD45<sup>+</sup> population. CD11b<sup>+</sup>F4/80<sup>+</sup> macrophages were divided into MHC class II (I-a/I-e) and CD124<sup>+</sup>CD206<sup>+</sup> populations. Expression of TNF- $\alpha$  (M1-like macrophages) and IL-10 (M2-like macrophages) were determined on MHC class II subsets and CD124<sup>+</sup>CD206<sup>+</sup> subsets respectively

(Related to Fig. 2a).

# Supplementary Figure. 5

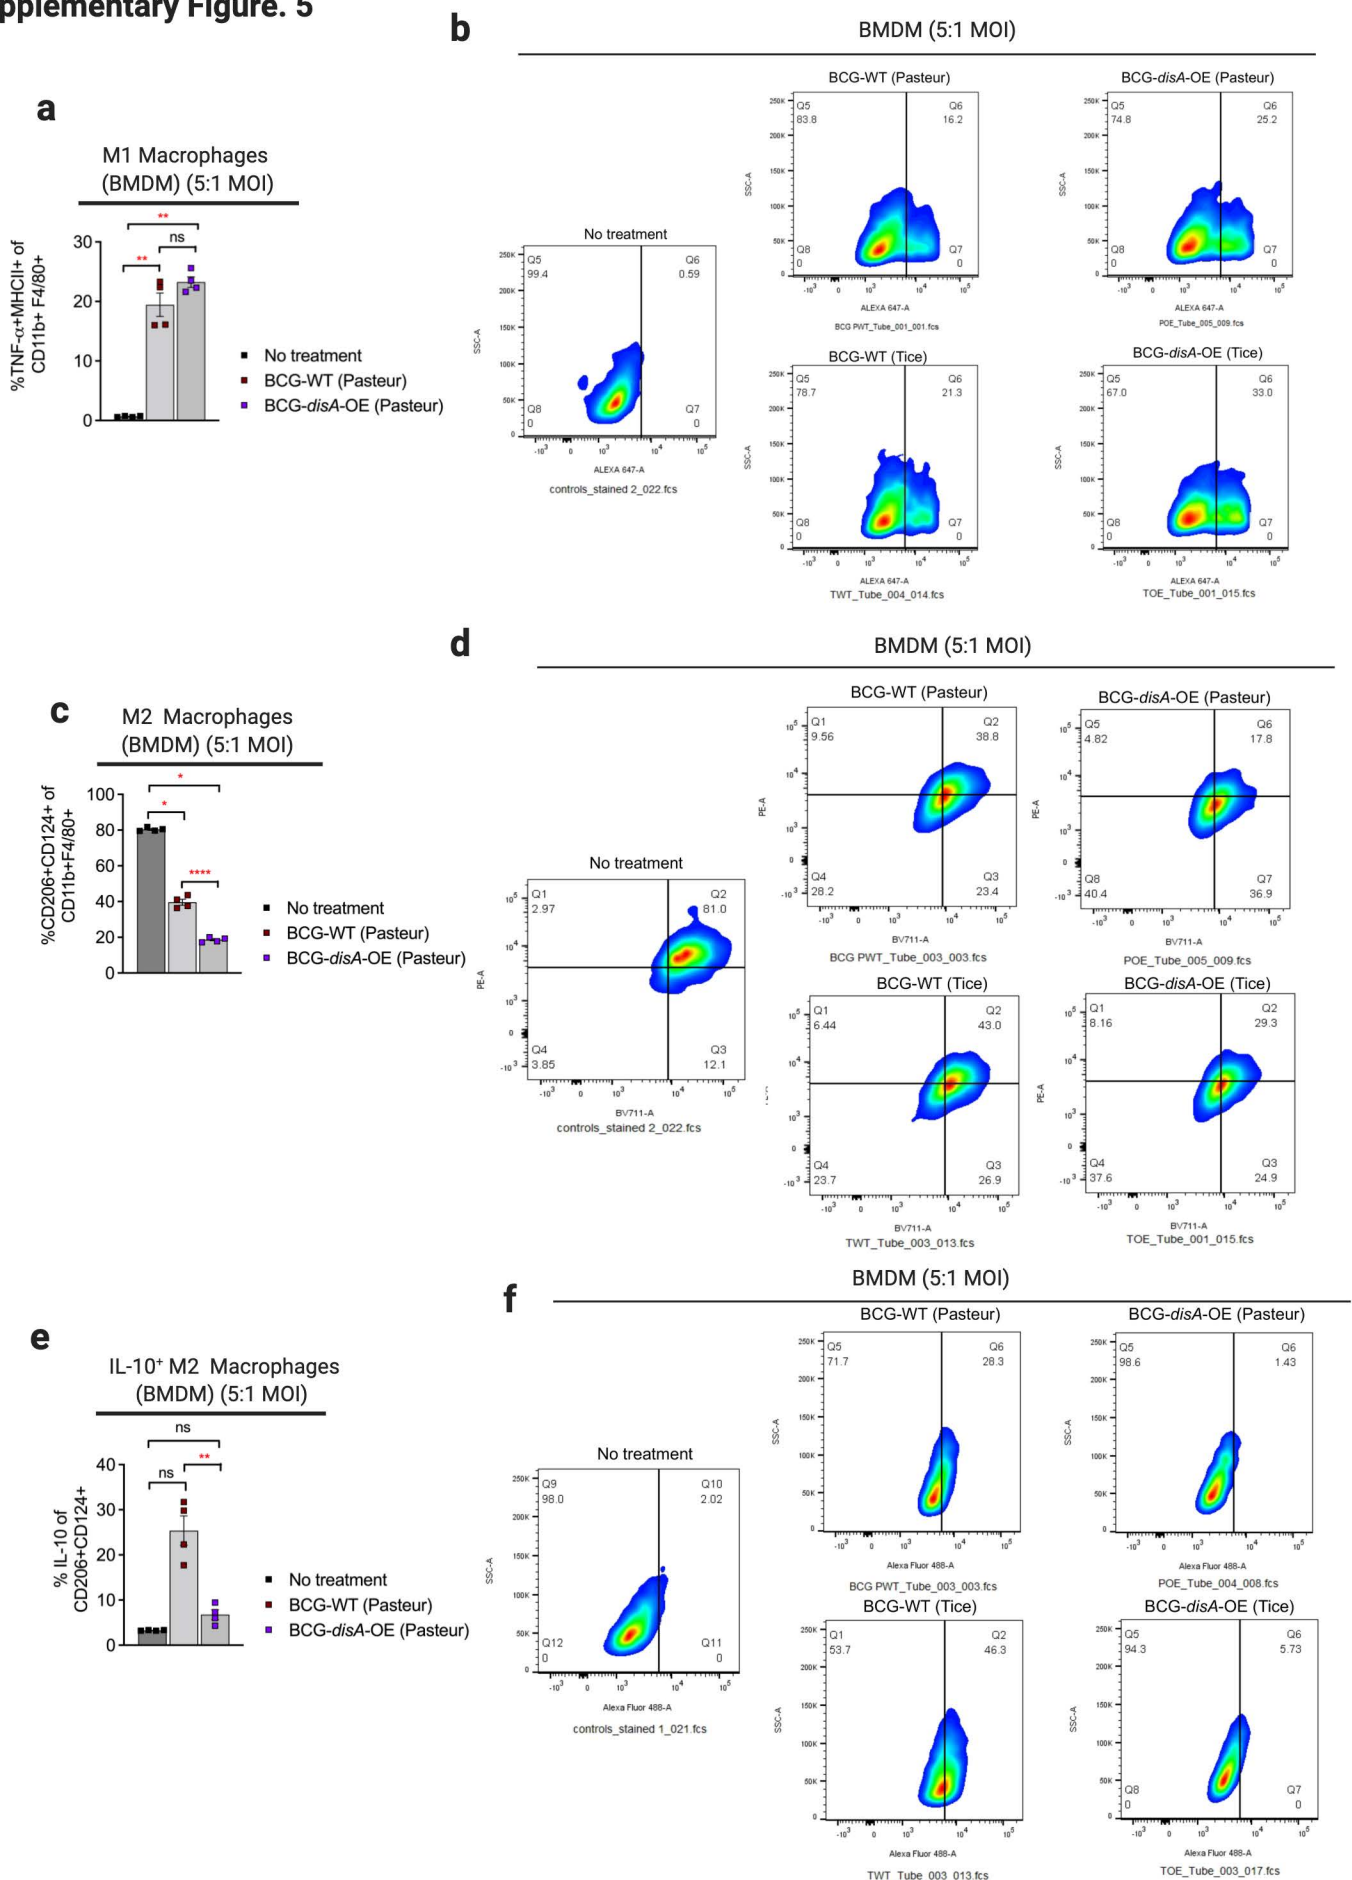

**Supplementary Figure 5. BCG-*disA*-OE induces macrophage reprogramming and favors stronger inflammatory macrophage shift in murine BMDMs. a-b.** Percentage TNF- $\alpha$ <sup>+</sup> M1-like macrophages (MHC Class II<sup>+</sup>CD11b<sup>+</sup>F4/80<sup>+</sup>) and corresponding representative FACS plots. **c-d.** Percentage M2-like macrophages (CD206<sup>+</sup>CD124<sup>+</sup>) and corresponding representative FACS plots. **e-f.** Percentage IL-10<sup>+</sup> M2-like macrophages (CD206<sup>+</sup>CD124<sup>+</sup>) and corresponding representative FACS plots. Data are presented as mean values  $\pm$  S.E.M. (n = 4 independent biological replicate experiments). Statistical analyses done using 2-tailed Student's t-test (\* P < 0.05, \*\* P < 0.01, \*\*\* P < 0.001, \*\*\*\* P < 0.0001).

(Related

to

Fig.

2a).



## Supplementary Figure 6

Representative gating strategy for identification of Myeloid-Derived Suppressor Cells BMDMs (C57BL/6J)

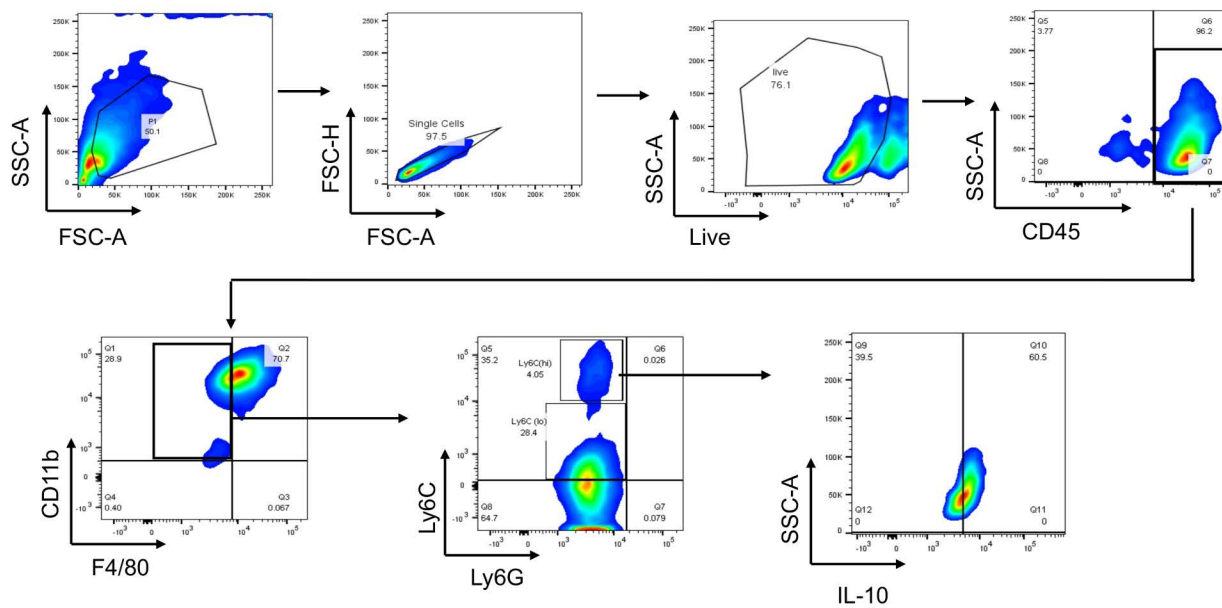

**Supplementary Figure 6. Gating scheme showing identification of myeloid-derived suppressor cell (MDSC) populations in primary mouse macrophages after BCG exposure.** Leukocyte lineage was determined on live cells by gating SSC-A against CD45<sup>+</sup> myeloid cells. Myeloid cells were differentiated into CD11b<sup>+</sup>F4/80<sup>+</sup> macrophages out of which CD11b<sup>+</sup>F4/80<sup>-</sup> myeloid population was divided into Ly6C and Ly6G. Next, the Ly6C<sup>hi</sup>Ly6G<sup>-</sup> immunosuppressive myeloid-derived suppressor cell populations were looked for IL-10 positivity (**Related to Fig. 2a**).

## Supplementary Figure. 7

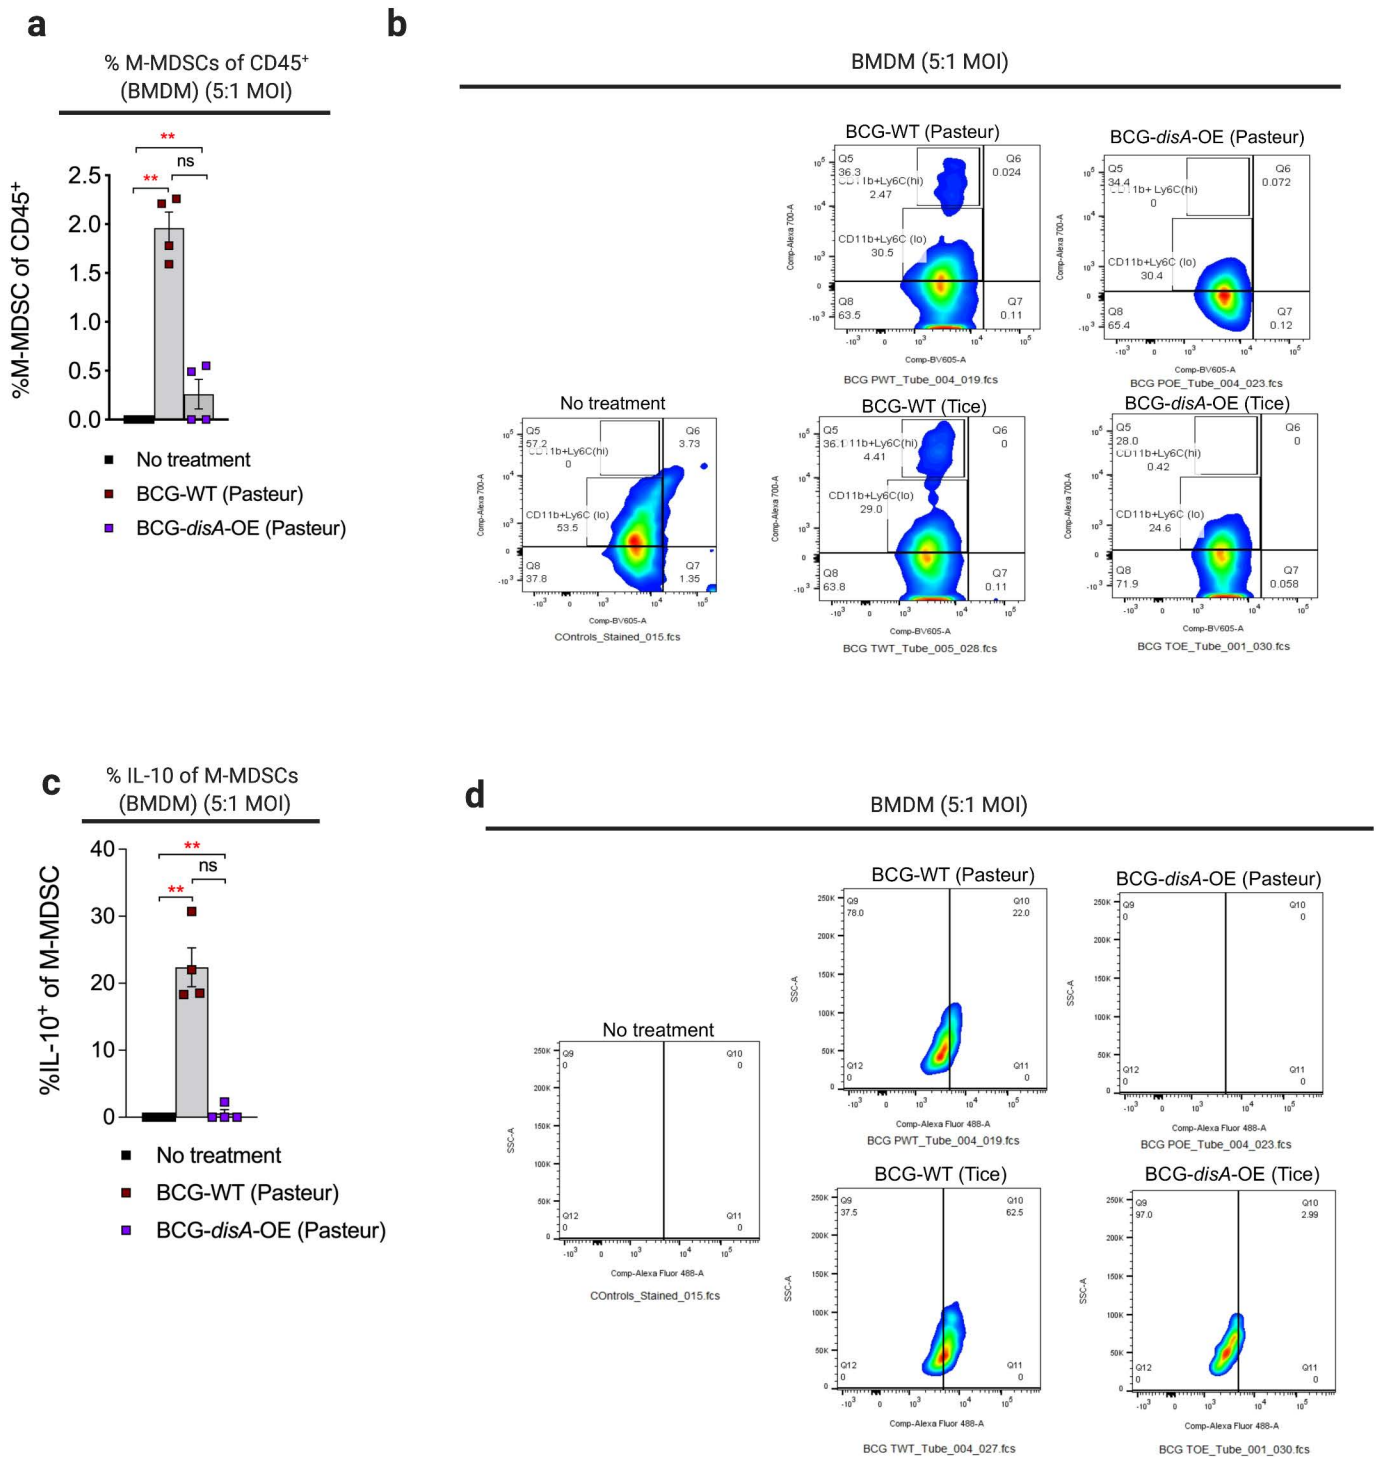

**Supplementary Figure 7. Immunosuppressive monocytic-MDSC (M-MDSC) populations in murine primary macrophages after BCG exposure. a-b.** Percentage of M-MDSCs and corresponding representative FACS plot. **c-d.** Percentage of IL-10<sup>+</sup> immunosuppressive M-MDSCs and corresponding representative FACS plots. Data are presented as mean values  $\pm$  S.E.M. (n = 4 independent biological replicate experiments). Statistical analyses done using 2-tailed Student's t-test (\* P < 0.05, \*\* P < 0.01, \*\*\* P < 0.001, \*\*\*\* P < 0.0001). (Related to Fig. 2a).

## Supplementary Figure 8

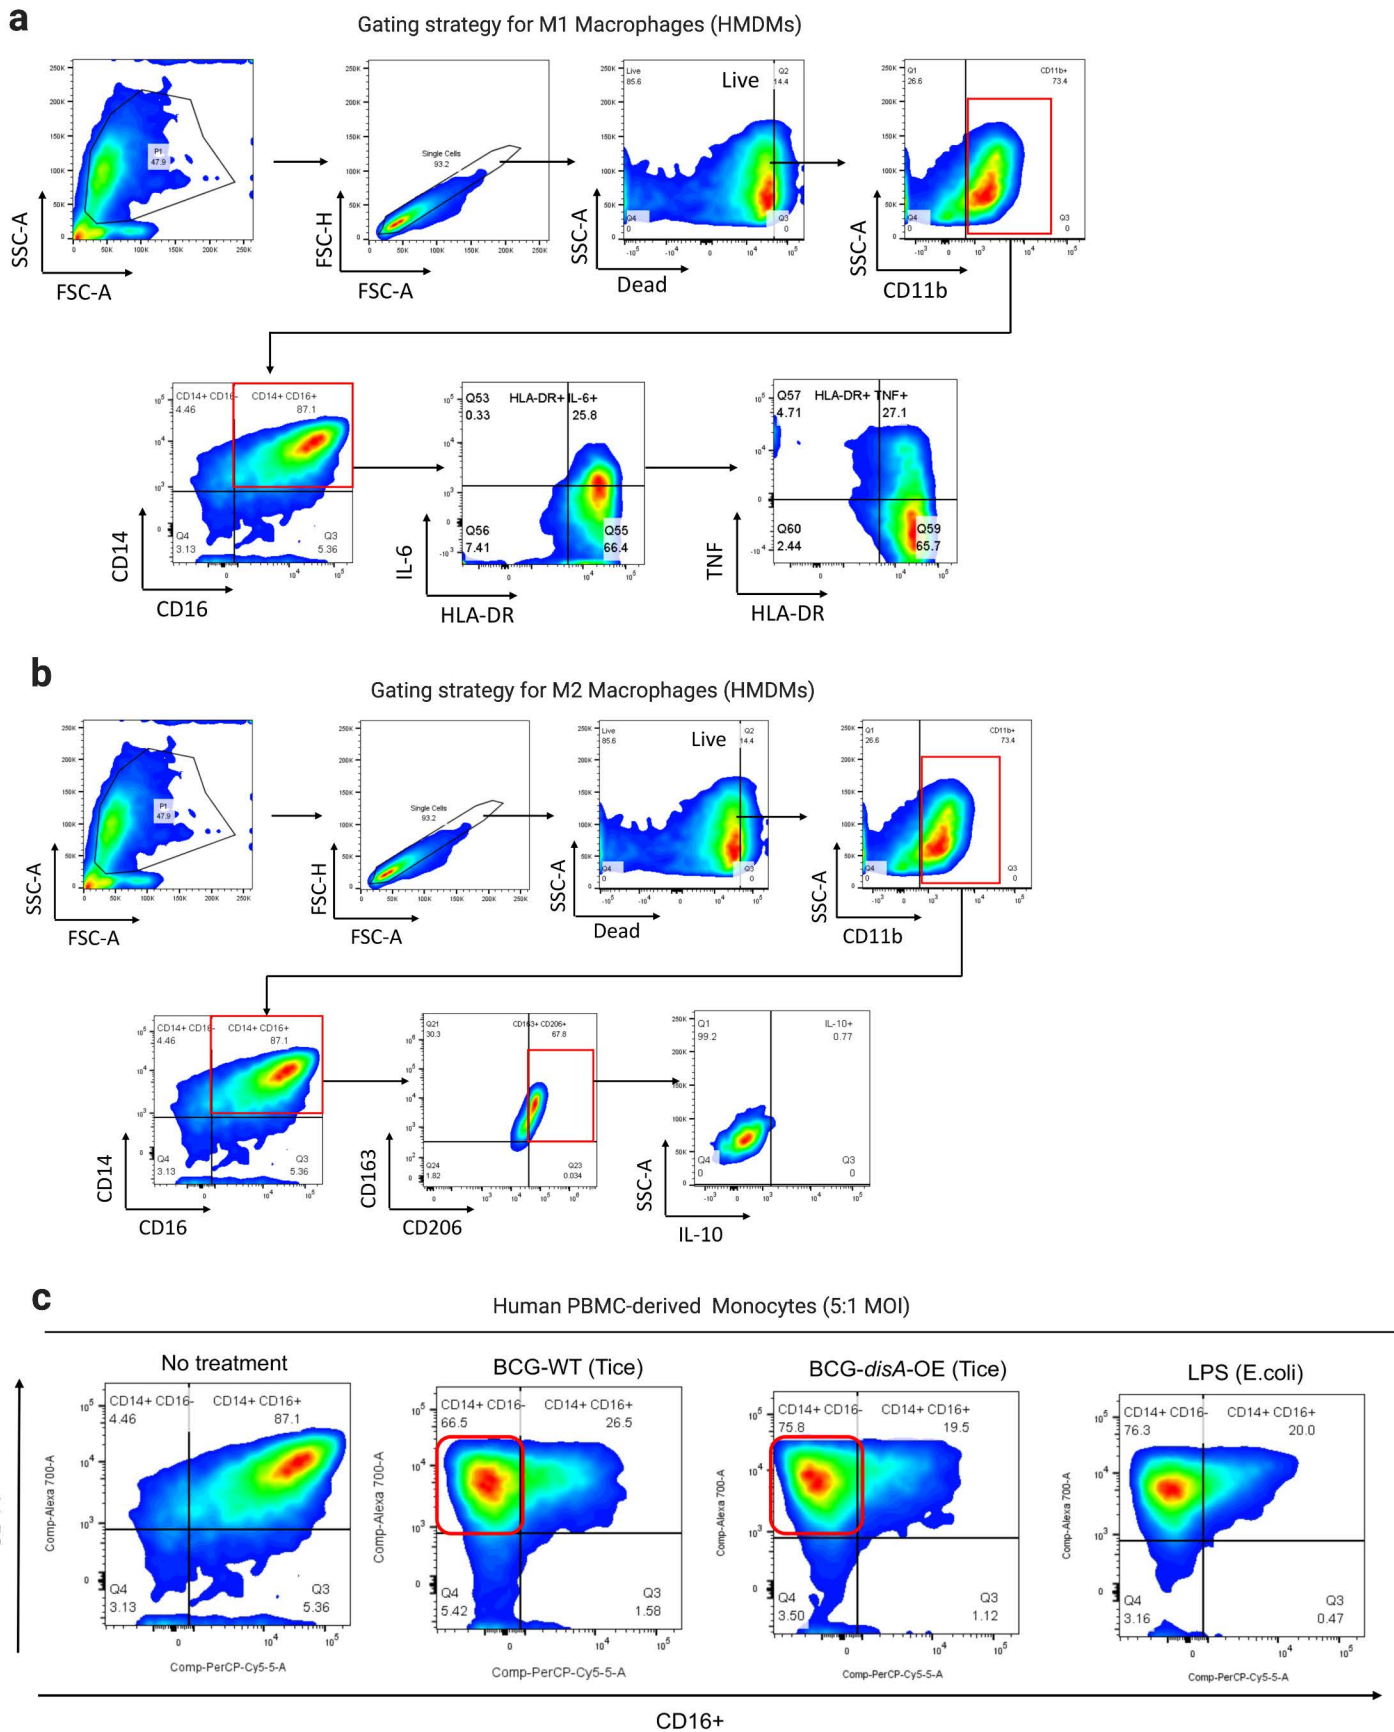

**Supplementary Figure 8. BCG-*disA*-OE strongly induces inflammatory human macrophages.** **a.** Gating strategy for M1-like macrophages **b.** Gating strategy for M2-like macrophages. **c.** Representative FACS plot showing percentage of classically activated (CD14<sup>+</sup>CD16<sup>+</sup>) macrophages after BCG exposure. (Related to Figure 2b).



# Supplementary Figure. 9

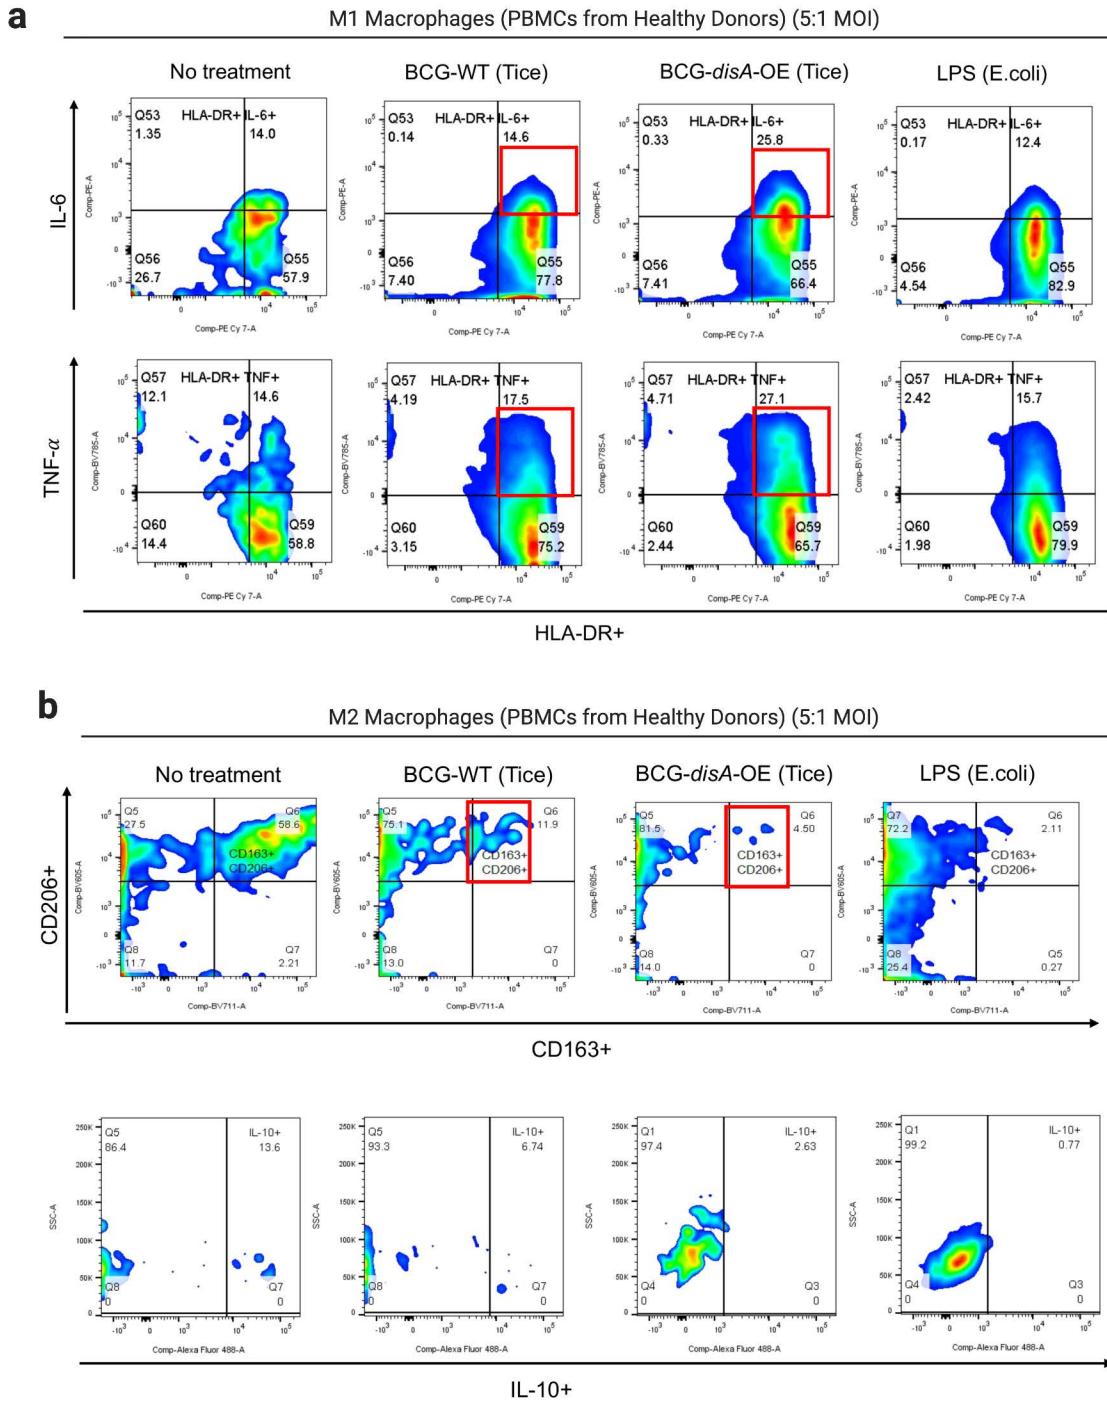

**Supplementary Figure 9. BCG-*disA*-OE causes strong inflammatory macrophage shift in human primary macrophages. a.** FACS plot showing inflammatory M1-like macrophages (CD14<sup>+</sup>CD16<sup>-</sup>). **b.** FACS plots showing immunosuppressive M2-like macrophages (CD206<sup>+</sup>CD163<sup>+</sup> of CD14<sup>+</sup>CD16<sup>+</sup>) after BCG exposure. (Related to Figure 2b).

Supplementary Figure. 10

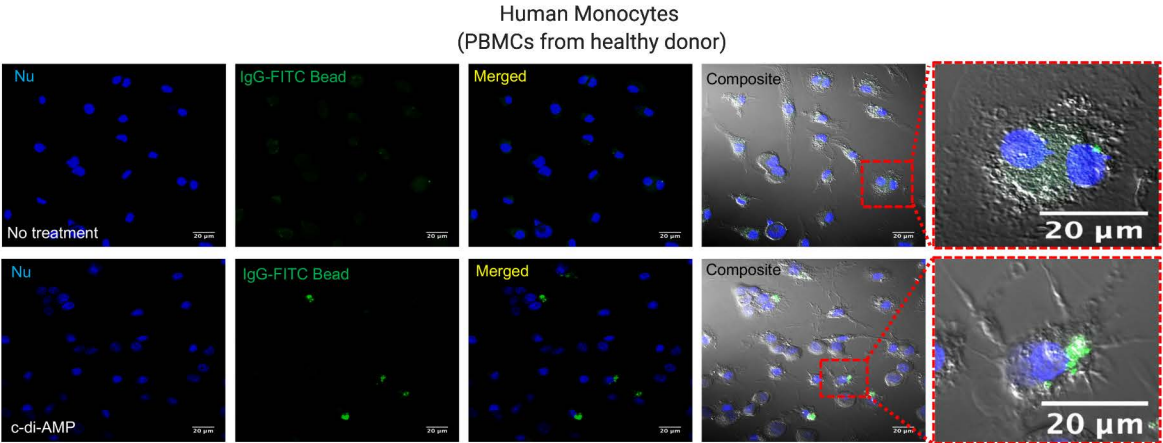

**Supplementary Figure 10. STING agonist c-di-AMP causes induction of macrophage activation.** Human macrophages were transfected with c-di-AMP for 24 h and phagocytosis of FITC-labeled IgG opsonized latex beads (green) was visualized using confocal microscopy on live cells. Hoechst was used for nuclear staining (blue). Images were acquired using LSM700 confocal microscope at 63X magnification. Images were process using Fiji software. Similar results were observed across two (n= 2) independent biological replicate experiments.

## Supplementary Figure 11

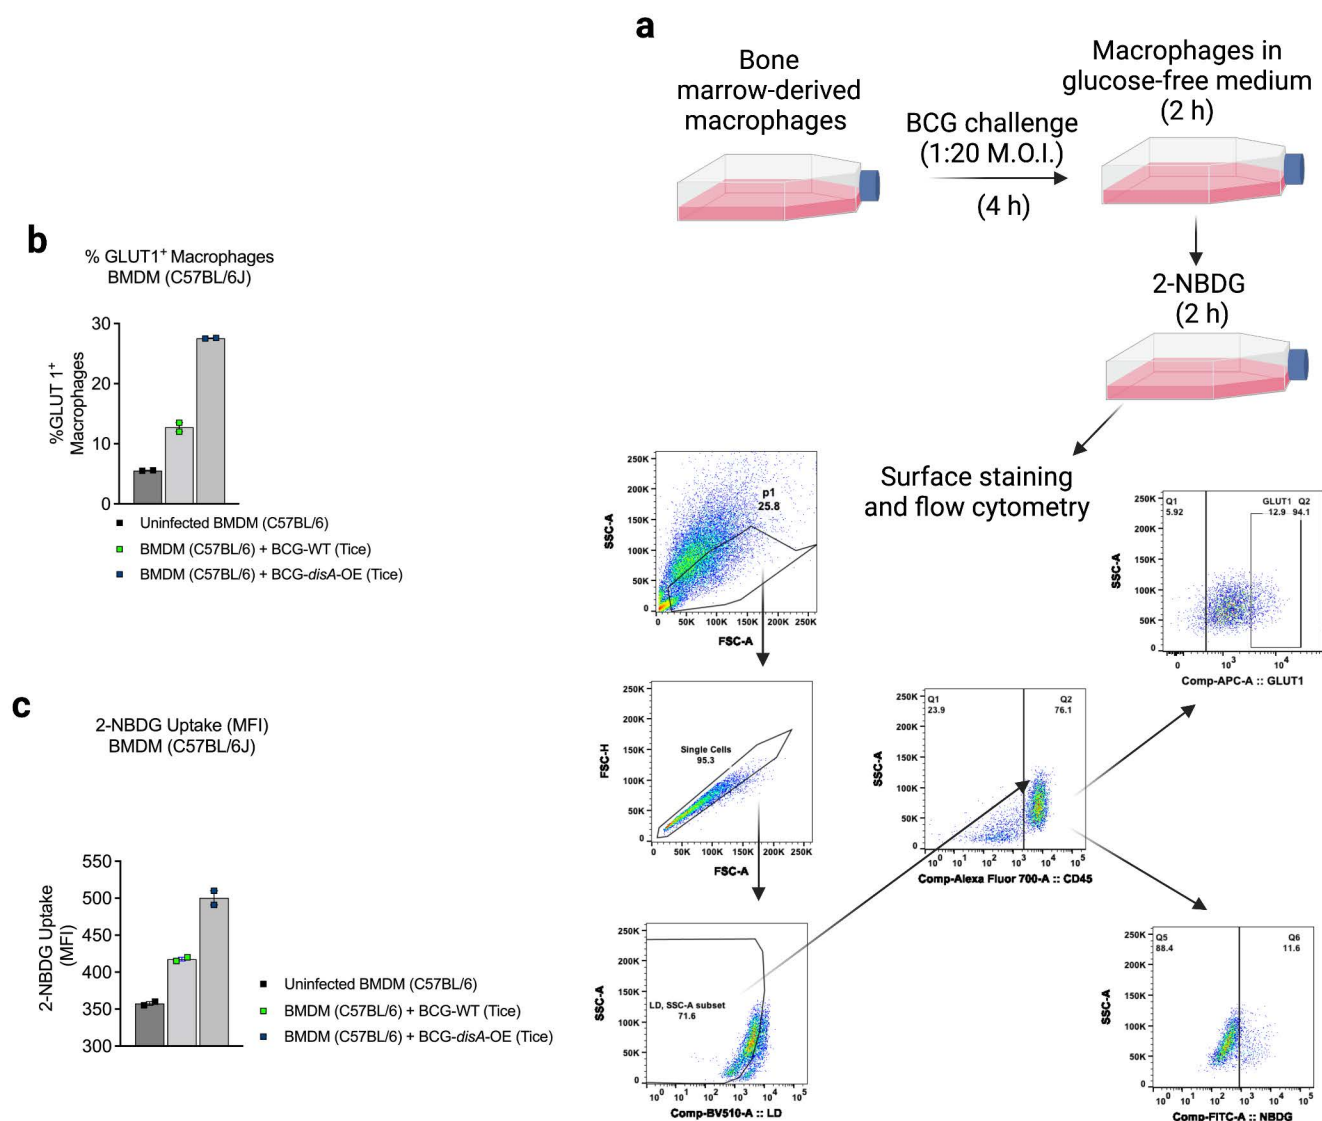

**Supplementary Figure 11. BCG induced differential glucose uptake in bone-marrow-derived macrophages (BMDMs).** **a.** Experimental layout showing the strategy employed to determine intracellular uptake of fluorescent glucose. Briefly macrophages were infected at a ratio of 1:20 (macrophage vs BCG ratio) in the presence of glucose-free medium followed by addition of exogenous 2-NBDG. Macrophages were subsequently stained for GLUT1 and were investigated using flow cytometry. **b-c.** Bar diagram showing induced expression of GLUT1 and intracellular fluorescent 2-NBDG in BMDMs following infection by BCG strains. Data are represented as mean values  $\pm$  S.E.M. ( $n = 2$  independent biological replicate experiments). Data analyses were carried out using FACSDiva (v 9.0), Flowjo (v10) and Graphpad Prism software (v 9.0).

## Supplementary Figure. 12

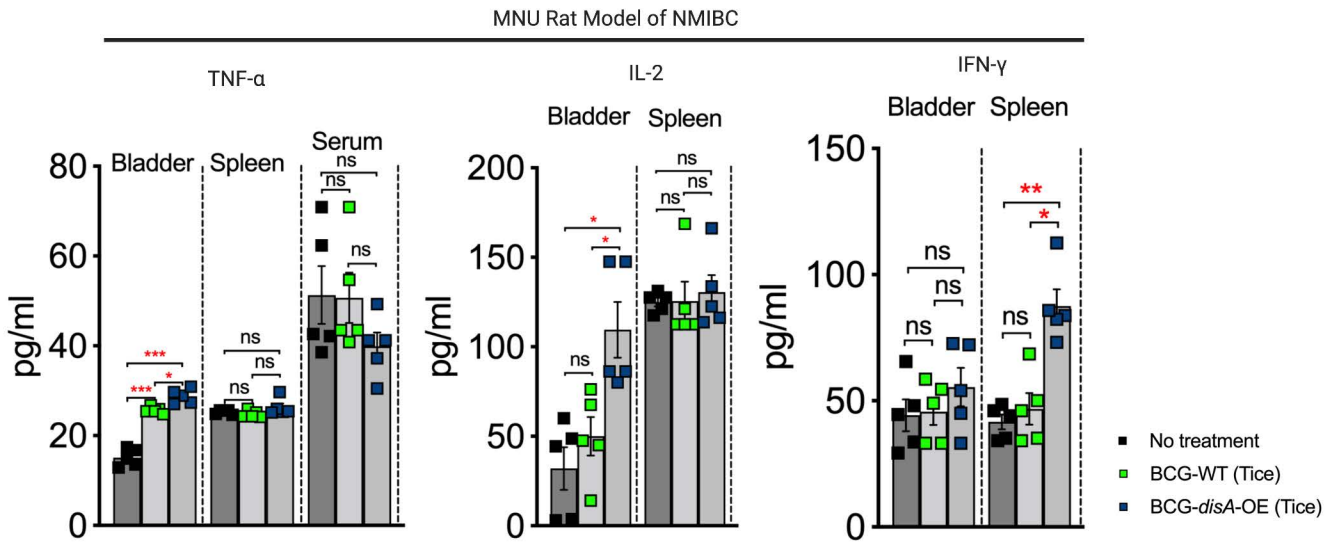

**Supplementary Figure 12. Cytokine changes elicited by BCG-WT and BCG-*disA*-OE in the orthotopic, carcinogen-induced rat model of NMIBC.** M1-like macrophage cytokines in MNU rat bladder, spleen and blood serum at necropsy at week 24 (n=5 animals / group). Data are presented as mean values  $\pm$  S.E.M. Statistical analyses done using 2-tailed Student's t-test (\* P < 0.05, \*\* P < 0.01, \*\*\* P < 0.001). (Related to Figure 5).

## Supplementary Figure 13

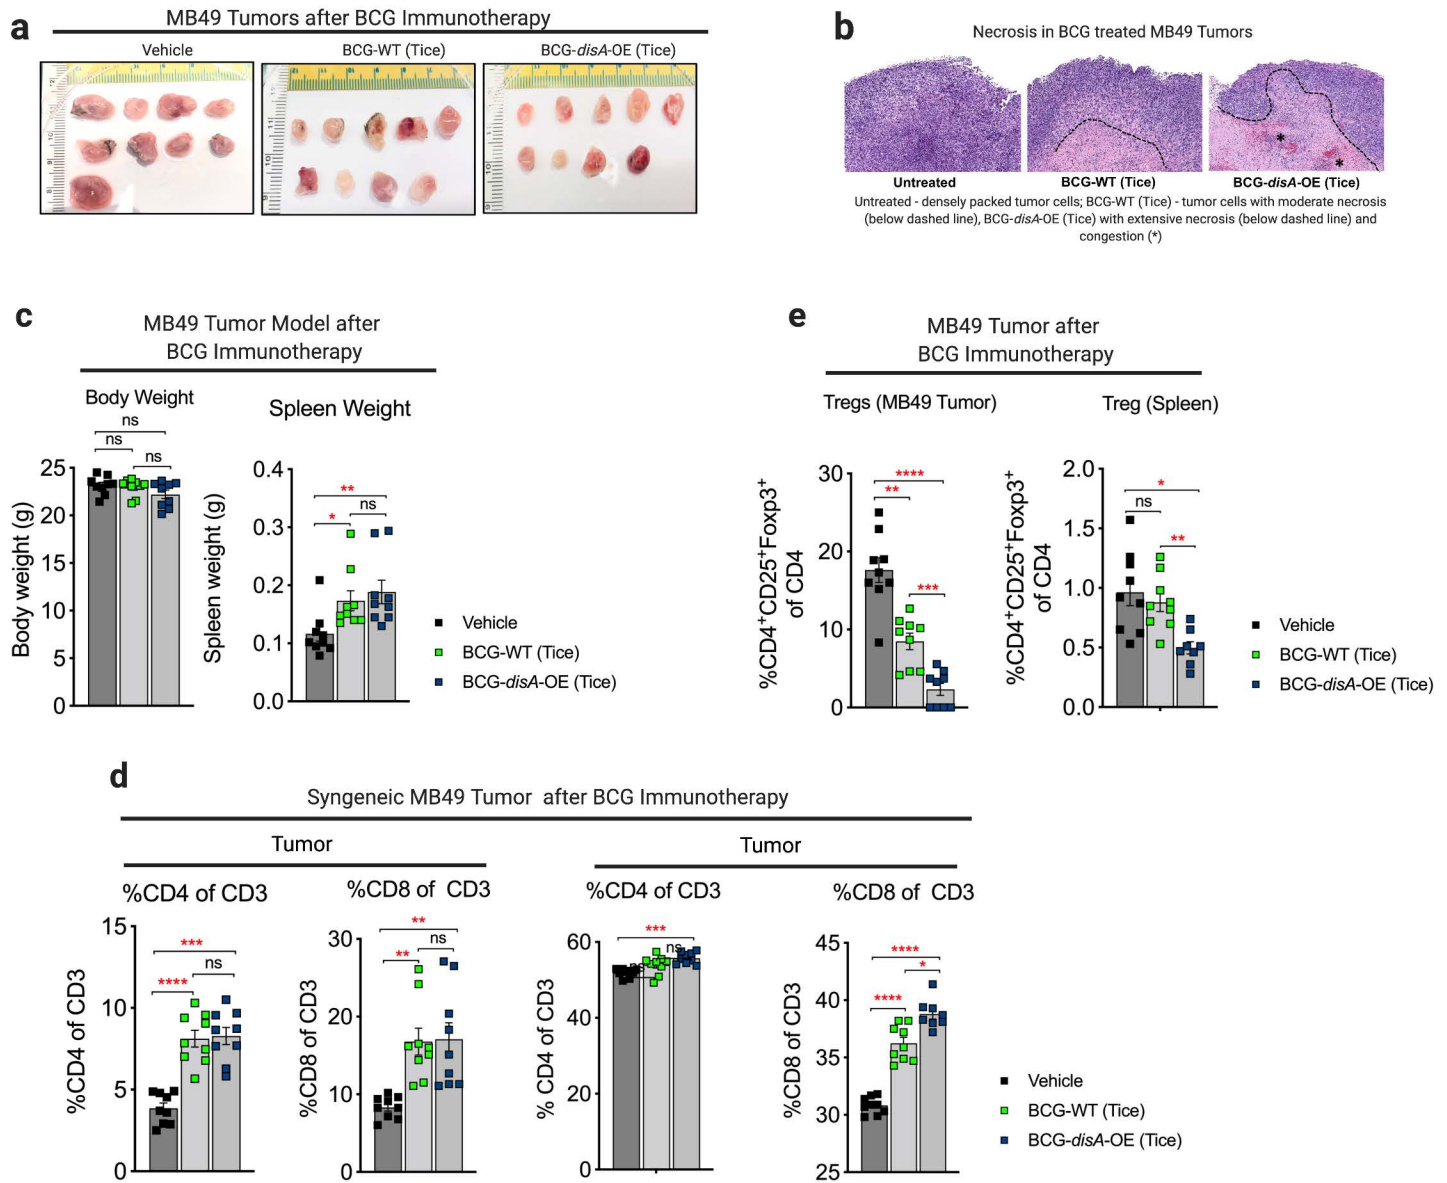

**Supplementary Figure 13. BCG-*disA*-OE causes reduced tumor outgrowth, greater T effector recruitment, and reduced Tregs in heterotopic syngeneic MB49 mouse model of urothelial cancer.** **a.** Tumors at necropsy on day 21 (n= 9 animals / group). **b.** Representative H & E staining showing necrotic areas and congestion in MB49 tumors. Similar observations were made in randomly selected 3 (n=3) tumor tissue slides per group. **c.** Body and spleen weight after necropsy (n=9 animals/group). **d.** Increased percentage of tumor infiltrating CD4<sup>+</sup> and CD8<sup>+</sup> T cells in MB49 tumors and mouse spleens (n=9 animals / group). **e.** Decreased percentage of CD4<sup>+</sup> Treg in tumor and spleen of MB49 tumor bearing animals (n=9 animals/group). Data are represented as mean values  $\pm$  S.E.M. Statistical analyses done using 2-tailed Student's t-test (\* P < 0.05, \*\* P < 0.01, \*\*\*\* P < 0.0001). (Related to Fig 6).



## Supplementary Figure.14

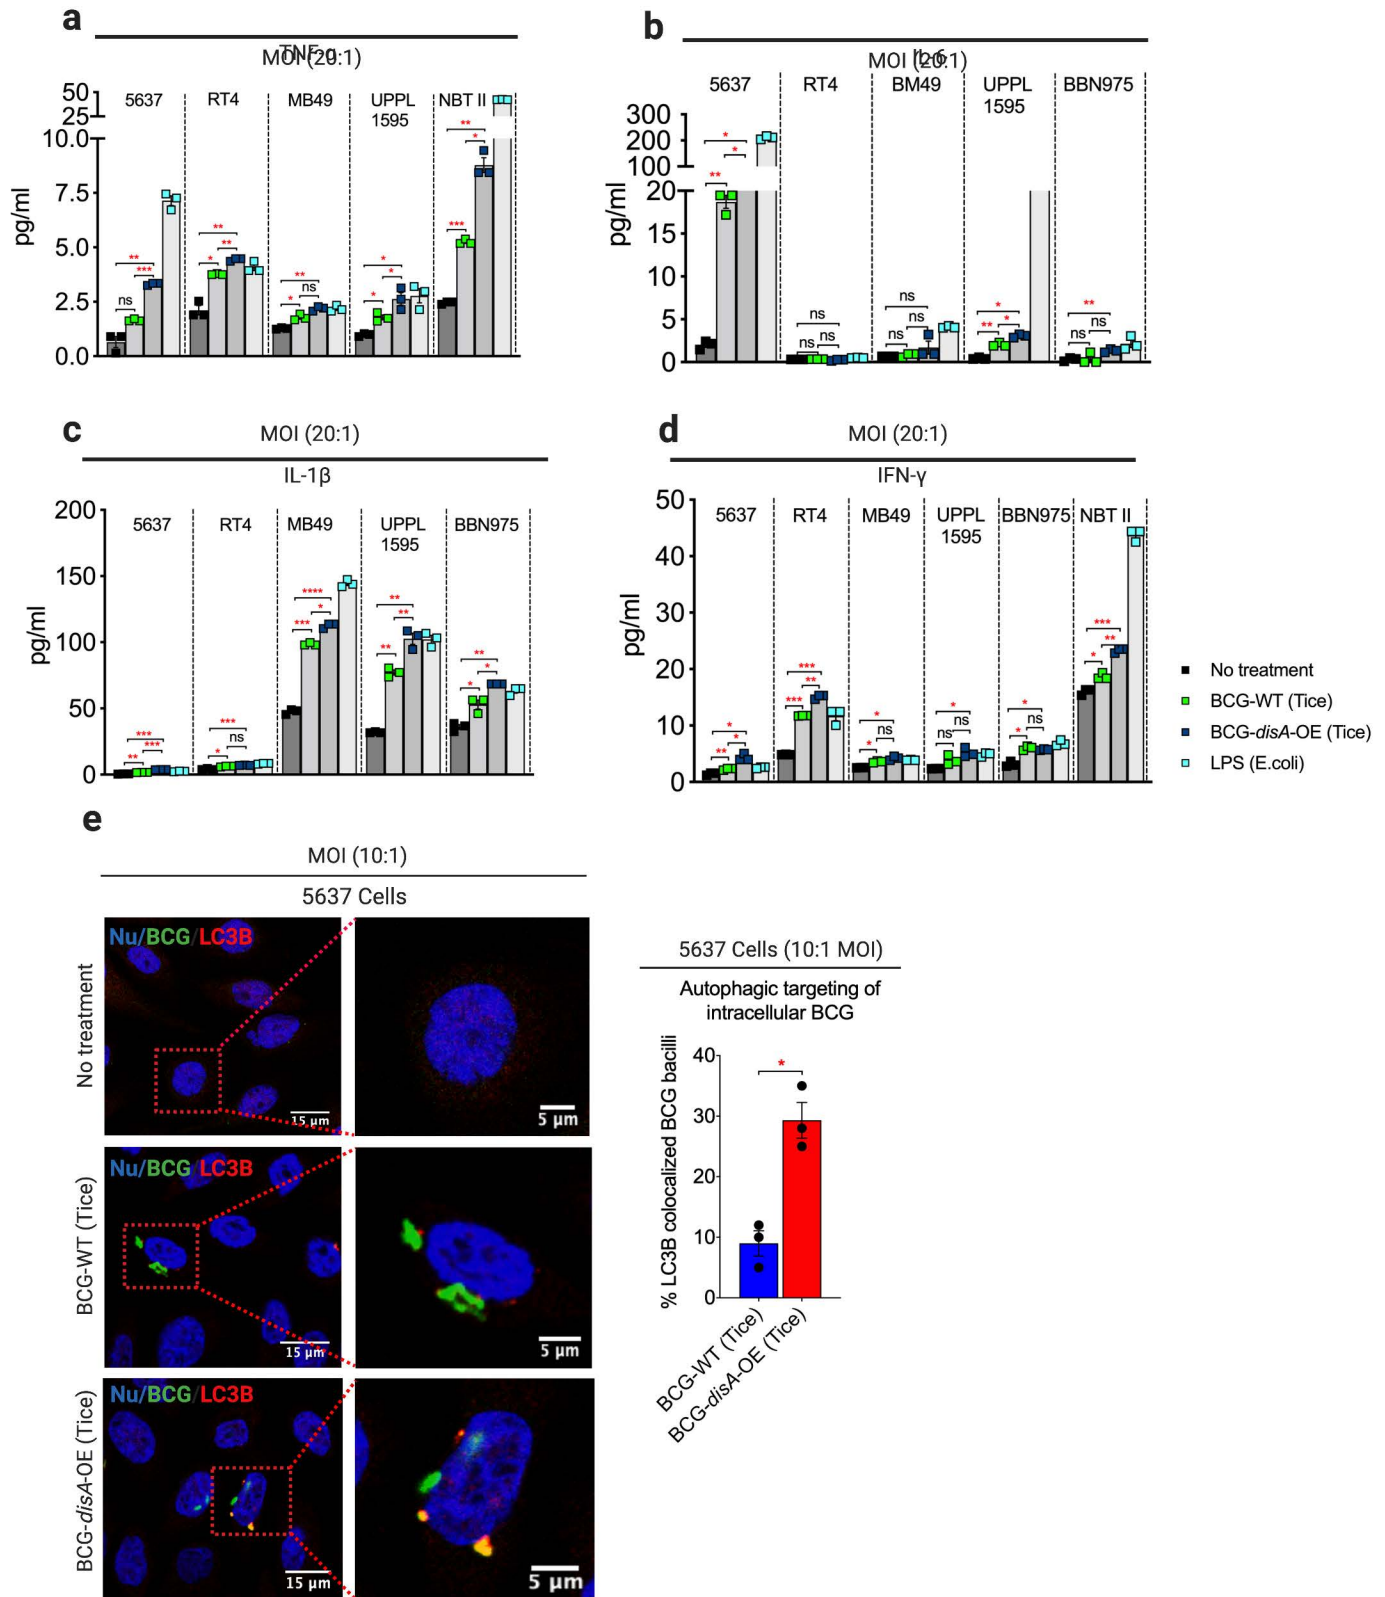

**Supplementary Figure 14. BCG-*disA*-OE elicits greater pro-inflammatory cytokine responses and autophagy than BCG-WT in human and murine urothelial carcinoma cells.** **a-d.** TNF- $\alpha$ , IL-6, IL-1 $\beta$  and IFN- $\gamma$  levels in urothelial carcinoma cell lines: 5637 (human epithelial high grade carcinoma), RT4 (human transitional low grade carcinoma cells), NBT II (carcinogen-induced rat tumor), MB49, UPPL1595, and BBN975 (all carcinogen-induced mouse tumors). Cytokine levels were measured by ELISA after 24 hr exposures at MOI of 20:1. Data are presented as mean values  $\pm$  SEM ( $n = 3$  independent biological replicate experiments). **e.** Autophagy induction in the 5637 human urothelial carcinoma cells in representative confocal photomicrographs ( $n=3$  independent biological replicate experiments). Colocalization of FITC-labeled BCG strains (green), LC3B autophagic puncta (red) appears in yellow; nuclei are blue. Cells were fixed using 4% paraformaldehyde 3h after infection (MOI 10:1), and images obtained with an LSM700 confocal microscope and Fiji software processing. Statistical analyses done using 2-tailed Student's-test (\*  $P < 0.05$ , \*\*  $P < 0.01$ , \*\*\*  $P < 0.001$ , \*\*\*\*  $P < 0.0001$ ). Data shown are for BCG-Tice; similar findings were observed for BCG-Pasteur.

# Supplementary Figure. 15

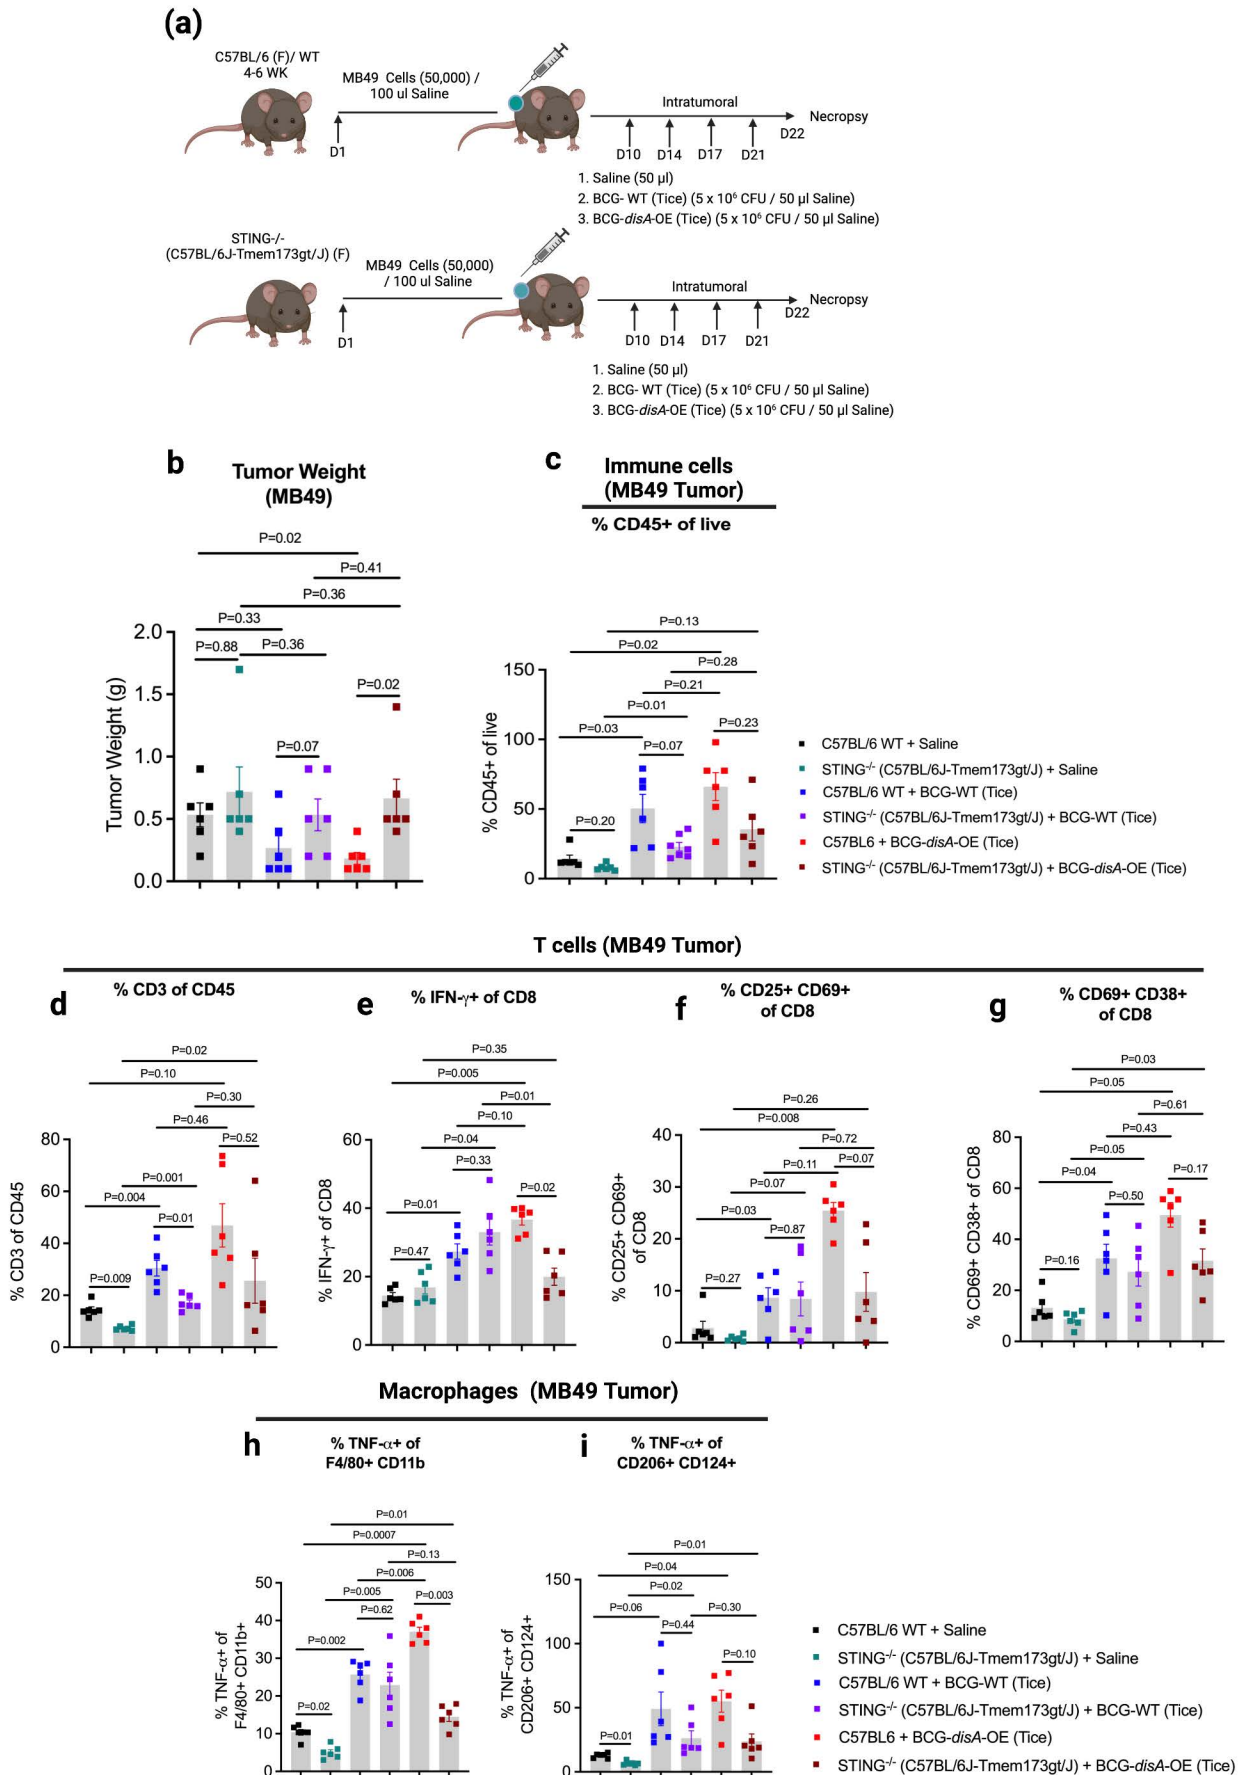

**Supplementary Figure 15. Improved antitumor efficacy of BCG-*disA*-OE is STING-dependent.** **a.** Schematic diagram of MB49 syngeneic mouse model of urothelial tumor. **b.** tumor weight at the time of necropsy. **c.** total CD45<sup>+</sup> immune cells in tumors. **d.** total tumor infiltrating CD3<sup>+</sup> lymphocytes. **e.** IFN- $\gamma$ <sup>+</sup> tumor infiltrating CD8<sup>+</sup> T cells. **f-g.** activated CD8<sup>+</sup> T cells. **h.** tumor infiltrating inflammatory macrophages, and **i.** differential abundance of TNF<sup>+</sup> immunosuppressive macrophages in MB49 tumors after necropsy. Data are presented as mean values  $\pm$  S.E.M. (n= 6 animals / group). Statistical analyses done using 2-tailed Student's t-test (\* P < 0.05, \*\* P < 0.01, \*\*\* P < 0.001, \*\*\*\* P < 0.0001).

## Supplementary Figure. 16

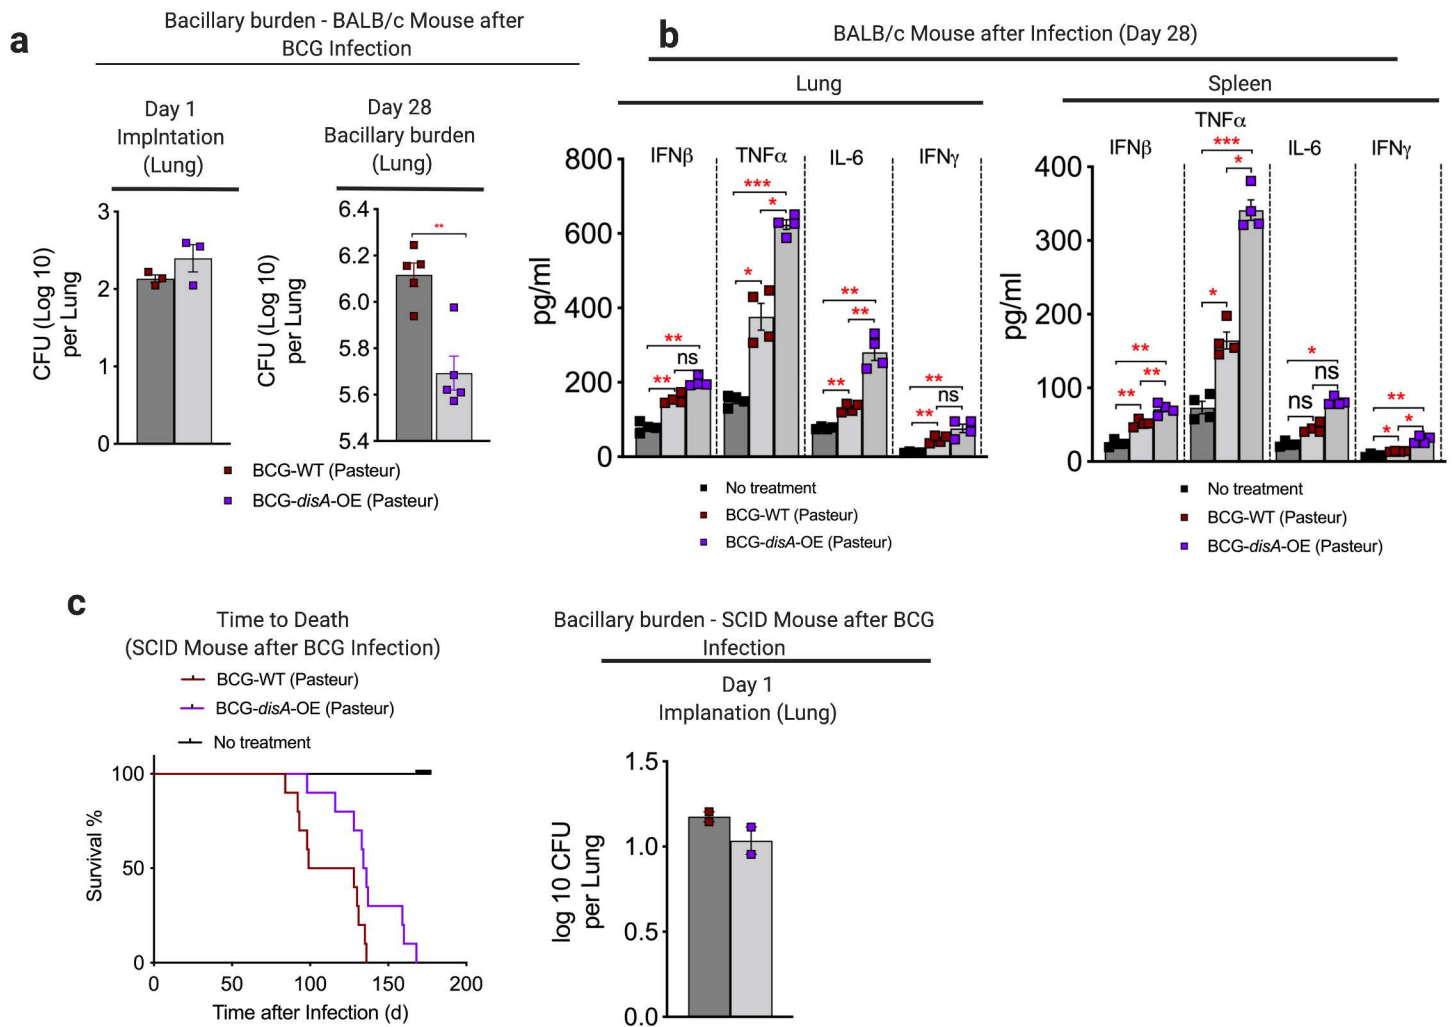

**Supplementary Figure 16. BCG-*disA*-OE (Pasteur) is less pathogenic than BCG-WT in mouse models and elicits stronger proinflammatory cytokines in vivo.** **a.** Lung colony forming unit (CFU) counts at day 1 (N= 3 animals / group) and day 28 (n= 5 animals / group). Data are presented as mean values  $\pm$  S.E.M. **b.** Levels of the pro-inflammatory cytokines IFN- $\beta$ , TNF- $\alpha$ , IL-6, and IFN- $\gamma$  in mouse lungs and spleens determined by ELISA at day 28 (n= 4 animals / group). Data are presented as mean values  $\pm$  S.E.M. **c.** Percent survival of SCID mice following low dose challenge (n= 10 animals / group). The day 1 lung CFU counts (n= 2 animals / group) are shown at right. Statistical analyses done using 2-tailed Student's t-test (\* P < 0.05, \*\* P < 0.01, \*\*\* P < 0.001, \*\*\*\* P < 0.0001). (Related to Fig. 7)

**Supplementary Table. 1: List of bacterial strains, cell lines, plasmids and antibodies used in the study**

| Name                                   | Description/Source                                                                                                                                     |
|----------------------------------------|--------------------------------------------------------------------------------------------------------------------------------------------------------|
| <b>Bacterial strains</b>               |                                                                                                                                                        |
| <b><i>M. tuberculosis</i> strain</b>   |                                                                                                                                                        |
| Mtb-CDC1551                            | Wild-type <i>M. tuberculosis</i>                                                                                                                       |
| <b><i>M. bovis</i> BCG strains</b>     |                                                                                                                                                        |
| BCG Pasteur                            | <i>M. bovis</i> BCG Pasteur                                                                                                                            |
| BCG- <i>disA</i> -OE (Pasteur)         | BCG Pasteur strain overexpressing <i>disA</i> (MT3692) of <i>M.tb</i>                                                                                  |
| BCG Tice                               | <i>M. bovis</i> BCG Tice                                                                                                                               |
| BCG- <i>disA</i> -OE (Tice)            | BCG Tice strain overexpressing <i>disA</i> (MT3692) of <i>M.tb</i>                                                                                     |
| <b><i>E. coli</i> strain</b>           |                                                                                                                                                        |
| DH5- $\alpha$                          | Competent <i>E. coli</i> (High Efficiency)                                                                                                             |
| <b>Cell lines</b>                      |                                                                                                                                                        |
| <b>Urinary bladder carcinoma cells</b> |                                                                                                                                                        |
| RT4 (ATCC® HTB-2™)                     | Human low grade urothelial cancer                                                                                                                      |
| 5637 (ATCC® HTB-9™)                    | Human high-grade urothelial cancer                                                                                                                     |
| NBT-II (ATCC® CRL-1655™)               | N-butyl-N-(4-hydroxybutyl) nitrosamine induced tumor cell line in Rattus norvegicus Nara Bladder Tumor No. 2                                           |
| MB49 (Cat. SSC148, EMD Millipore)      | DMBA [7,12-dimethylbenz[a]anthracene] induced murine urothelial carcinoma cells,                                                                       |
| UPPL-1595                              | Luminal cell line established from a spontaneous primary bladder tumor in an Uroplakin-Cre driven PTEN/P53 knockout genetically engineered mouse model |
| BBN 975                                | Basal- cell line established from 0.05% N-Butyl-N-(4-hydroxybutyl) nitrosamine (BBN) induced murine urothelial cancer model                            |
| J28 (ATCC® HTB-1™)                     | high grade urothelial cancer                                                                                                                           |
| <b>Reporter cells</b>                  |                                                                                                                                                        |

|                                           |                                                      |              |                 |
|-------------------------------------------|------------------------------------------------------|--------------|-----------------|
| RAW-Lucia ISG<br>(InvivoGen)              | IFN Reporter Raw 264.7 murine macrophages            |              |                 |
| <b>Macrophage cell lines</b>              |                                                      |              |                 |
| J774A.1 (ATCC® TIB67™)                    | Murine macrophage cell line                          |              |                 |
| <b>Plasmids</b>                           |                                                      |              |                 |
| pSD5.hsp60                                | Mycobacterial expression plasmid with hsp60 promoter |              |                 |
| pSD5hsp60.MT3692                          | <i>disA</i> over-expression plasmid                  |              |                 |
| <b>Confocal Microscopy Reagents</b>       |                                                      |              |                 |
| <b>Primary Antibodies</b>                 |                                                      |              |                 |
| <b>Name</b>                               | <b>Source</b>                                        | <b>#Cat.</b> | <b>Dilution</b> |
| LC3B                                      | Novus Biologicals                                    | NB100-2220   | 1:200           |
| P62/SQSTM1                                | Sigma-Aldrich                                        | P0067        | 1:100           |
| <b>Secondary Antibodies</b>               |                                                      |              |                 |
| Goat anti-Rabbit IgG Alexa Fluor Plus 647 | Thermo Fisher Scientific                             | A32733       | 1:1000          |
| <b>Chemicals/Probes</b>                   |                                                      |              |                 |
| Fluorescein 5(6)-isothiocyanate (FITC)    | Sigma-Aldrich                                        | 46950        |                 |
| Hoechst 33342                             | Thermo Fisher Scientific                             | 62249        |                 |
| <b>Flow Cytometry Reagents</b>            |                                                      |              |                 |
| <b>Antibodies (mouse BMDM study)</b>      |                                                      |              |                 |
| anti-CD45 (clone 30-F11)                  | Biolegend                                            | 103128       | 1:200           |
| anti-CD124 (I clone 015F8)                | Biolegend                                            | 144804       | 1:50            |
| anti-I-A/I-E (clone M5/114.15.2)          | Biolegend                                            | 107645       | 1:200           |
| anti-Ly6C (clone HK1.4)                   | Biolegend                                            | 128046       | 1:50            |
| anti-CD11b (clone M1/70)                  | Biolegend                                            | 101206       | 1:200           |
| anti-F4/80 (clone BM8)                    | Biolegend                                            | 123147       | 1:50            |
| anti-Ly6G (clone 1A8)                     | Biolegend                                            | 127641       | 1:100           |
| anti CD206 (clone C068C2)                 | Biolegend                                            | 141721       | 1:200           |
| anti-TNF (clone MP6-XT22)                 | Biolegend                                            | 506341       | 1:100           |



|                                                                                 |               |          |       |
|---------------------------------------------------------------------------------|---------------|----------|-------|
| anti- IL-10 (clone JES5-16E3)                                                   | eBioscience   | 505021   | 1:50  |
| Anti-Glut1 (clone EPR3915)                                                      | Abcam         | ab195020 | 1:50  |
| <b>Antibodies (HMDM study)</b>                                                  |               |          |       |
| anti-CD16 (clone 3G8)                                                           | Biolegend     | 302028   | 1:50  |
| anti-CD14 (clone 63D3)                                                          | Biolegend     | 367113   | 1:50  |
| anti-HLA-DR (clone L243)                                                        | Biolegend     | 307615   | 1:50  |
| anti-CD11b (clone ICRF44)                                                       | Biolegend     | 301351   | 1:100 |
| anti-TLR4 (clone HTA125)                                                        | Biolegend     | 312811   | 1:50  |
| anti-CD206 (clone 15-2)                                                         | Biolegend     | 321140   | 1:50  |
| anti-CD163 (clone GHI/61)                                                       | Biolegend     | 333630   | 1:100 |
| anti-TNF (clone MAb11)                                                          | Biolegend     | 502948   | 1:40  |
| anti-IL-6 (clone MQ2-13A5)                                                      | Biolegend     | 501107   | 1:40  |
| <b>Antibodies (myeloid cell panel, Syngeneic MB49 urothelial cancer model)</b>  |               |          |       |
| CD45 (clone 30-F11)                                                             | Biolegend     | 103128   | 1:100 |
| CD124 (IL-4Ra) (clone I015F8)                                                   | Biolegend     | 144804   | 1:50  |
| I-a/I-e (clone M5/114.15.2)                                                     | Biolegend     | 107645   | 1:100 |
| F4/80 (clone BM8)                                                               | Biolegend     | 123147   | 1:100 |
| CD206 (clone C068C2)                                                            | Biolegend     | 141721   | 1:200 |
| TNF (clone MP6-XT22)                                                            | Biolegend     | 506345   | 1:40  |
| IL-10 (clone JES5-16E3)                                                         | Thermo Fisher | 505022   | 1:50  |
| <b>Antibodies (lymphoid cell panel, Syngeneic MB49 urothelial cancer model)</b> |               |          |       |
| CD45 (clone 30-F11)                                                             | Biolegend     | 103128   | 1:200 |
| CD25 (clone PC61)                                                               | Biolegend     | 102033   | 1:100 |
| CD3 (clone 17A2)                                                                | Biolegend     | 100248   | 1:50  |
| CD4 (clone GK1.5)                                                               | Biolegend     | 100434   | 1:100 |
| CD8a (clone 53-6.7)                                                             | Biolegend     | 100741   | 1:100 |
| FOXP3 (clone MF-14)                                                             | Biolegend     | 126406   | 1:50  |

|                                          |                   |              |       |
|------------------------------------------|-------------------|--------------|-------|
| Mouse IFN- $\gamma$ (clone XMG1.2)       | Biolegend         | 505835       | 1:50  |
| CD69 (clone H1.2F3)                      | Biolegend         | 104536       | 1:100 |
| CD38 (clone 90)                          | Biolegend         | 102712       | 1:100 |
| <b>Reagents/Kits</b>                     |                   |              |       |
| <b>Name</b>                              | <b>Source</b>     | <b>#Cat.</b> |       |
| Protein transport inhibitor cocktail     | eBioscience       | 00-4980-03   |       |
| Zombie Aqua™ Fixable Viability Kit       | Biolegend         | 423101       |       |
| TruStain FcX™                            | Biolegend         | 101320       |       |
| Fixation and Permeabilization Buffer Set | Biolegend         | 421403       |       |
| Human TruStain FcX™                      | Biolegend         | 422302       |       |
| True-Stain Monocyte Blocker™             | Biolegend         | 426102       |       |
| 2-NBDG Glucose Uptake Assay Kit          | Abcam             | ab235976     |       |
| <b>ELISA</b>                             |                   |              |       |
| <b>Mouse ELISA Kits</b>                  |                   |              |       |
| TNF- DuoSet                              | R and D Systems   | DY410        |       |
| IL-6 DuoSet                              | R and D Systems   | DY406        |       |
| IFN- DuoSet                              | R and D Systems   | DY485        |       |
| CCL2/JE/MCP-1 DuoSet                     | R and D Systems   | DY479        |       |
| LEGEND MAX™ Mouse IFN- $\beta$           | Biolegend         | 439407       |       |
| <b>Human ELISA Kits</b>                  |                   |              |       |
| TNF- DuoSet                              | R and D Systems   | DY210        |       |
| IL-6 DuoSet                              | R and D Systems   | DY206        |       |
| IFN- $\beta$ ELISA Kit                   | PBL Assay Science | 41410-2      |       |
| <b>Rat ELISA Kits</b>                    |                   |              |       |

|                                                       |                          |            |
|-------------------------------------------------------|--------------------------|------------|
| IFN- Quantikine                                       | R and D Systems          | RIF00      |
| TNF- Quantikine                                       | R and D Systems          | RTA00      |
| IL-2 Quantikine                                       | R and D Systems          | R2000      |
| <b>Chromatin Immunoprecipitation</b>                  |                          |            |
| <b>ChIP Antibodies</b>                                |                          |            |
| Histone H3K9me3 (H3K9 Trimethyl) Polyclonal Antibody  | epigentek                | A-4036-100 |
| Anti-Histone H3 (tri methyl K4) antibody - ChIP Grade | abcam                    | ab8580     |
| <b>ChIP Reagents</b>                                  |                          |            |
| BSA                                                   | Sigma-Aldrich            | A3294      |
| Salmon Sperm DNA                                      | Thermo Fisher Scientific | 15632011,  |
| HEPES                                                 | Sigma-Aldrich            | H3375      |
| Formaldehyde                                          | Sigma-Aldrich            | 252549     |
| EGTA                                                  | Sigma-Aldrich            | 03777      |
| EDTA                                                  | Sigma-Aldrich            | E6758      |
| TritonX-100                                           | Sigma-Aldrich)           | T8787      |
| SDS                                                   | Sigma-Aldrich            | 71736      |
| NaHCO3                                                | Sigma-Aldrich            | 5761       |
| Nuclease free water                                   | Thermo Fisher Scientific | AM9930     |
| SYBR green dye                                        | Applied Biosystems       | 4385614    |

**Supplementary Table. 2: Cloning and PCR primers used in the study**

| <b>Cloning primers used in the study</b> |                        |                                 |
|------------------------------------------|------------------------|---------------------------------|
| <b>Accession Number</b>                  | <b>Gene</b>            | <b>Sequence (5'-3')</b>         |
|                                          | pSD5hsp60.MT3692 (F)   | GGGCATCATATGCACGCTGTGACTCGTC    |
|                                          | pSD5hsp60.MT3692 (R)   | GGGACGCGTTATTGATCGCTGATGGTCGATT |
|                                          | Kanamycin cassette (F) | GAGAAACTCACCGAGGCAG             |
|                                          | Kanamycin cassette (R) | GTATTCGTCTCGCTCAGGC             |
| 32287254                                 | <i>M.tb</i> sigH (F)   | GCGATGGTGGCTTCTCCCTCG           |
|                                          | <i>M.tb</i> sigH (R)   | CCATCTTGACAGCTCGCGTAG           |
| <b>qPCR primers used in the study</b>    |                        |                                 |
| <b>Mouse Primers</b>                     |                        |                                 |
| 11461                                    | Mouse.β actin (F)      | TAAGGCCAACCGTGAAAAGATG          |
|                                          | Mouse.β actin (R)      | CTGGATGGCTACGTACATGGCT          |
| 21926                                    | Mouse.TNF-α (F)        | GACCCTCACACTCAGATCATC           |
|                                          | Mouse.TNF-α (R)        | GCTGCTCCTCCACTTGGT              |
| 15977                                    | Mouse.IFN-β (F)        | CCACAGCCCTCTCCATCAAC            |
|                                          | Mouse.IFN-β (R)        | CTCCGTCATCTCCATAGGGA            |
| 16193                                    | Mouse.IL6 (F)          | CTGCAAGAGACTTCCATCCAG           |
|                                          | Mouse.IL6 (R)          | CAGGTCTGTTGGGAGTGG              |
| 15978                                    | Mouse.IFN (F)          | AGCGGCTGACTGAACTCAGATTGT        |
|                                          | Mouse.IFN (R)          | GTCACAGTTTTTCAGCTGTATAGGG       |
| 16176                                    | Mouse.IL1 (F)          | GGAGAGTGTGGATCCCAA              |
|                                          | Mouse.IL1 (R)          | GTGGAGTTTGAGTCTGCAG             |
| 20296                                    | Mouse.MCP1 (F)         | GGCTCAGCCAGATGCAGTTAAC          |
|                                          | Mouse.MCP1 (R)         | GATCCTCTTGTAGCTCTCCAGC          |
| 16160                                    | Mouse.IL12b (F)        | GAAAGACGTTTATGTTGTAGAGG         |
|                                          | Mouse.IL12b (R)        | GACTCCATGTCTCTGGTCTG            |

|                      |                        |                           |
|----------------------|------------------------|---------------------------|
| 17329                | Mouse.CXCL9 (F)        | GGAGTTCGAGGAACCCTAGTG     |
|                      | Mouse.CXCL9 (R)        | GGGATTTGTAGTGGATCGTGC     |
| 15945                | Mouse.CXCL10 (F)       | GTGGGACTCAAGGGATCCCTCTC   |
|                      | Mouse.CXCL10 (R)       | GCTTCCCTATGGCCCTCATTC     |
| 18126                | Mouse.NOS2 (F)         | GTTCTCAGCCCAACAATACAAG    |
|                      | Mouse.NOS2 (R)         | GGAACATTCTGTGCTGTCCC      |
| 20299                | Mouse.CCL22 (F)        | CTCTGATGCAGGTCCCTATGGTG   |
|                      | Mouse.CCL22 (R)        | GGCAGAGGGTGACGGATGTAG     |
| <b>Human Primers</b> |                        |                           |
| 26827                | Human. RNU6A (F)       | CTCGCTTCGGCAGCACATATAC    |
|                      | Human. RNU6A (R)       | AATATGGAACGCTTCACGAATTTG  |
| 3456                 | Human.IFN $\beta$ (F)  | CAACTTGCTTGGATTCCCTACAAAG |
|                      | Human.IFN $\beta$ (R)  | TATTCAAGCCTCCCATTCAATTG   |
| 3569                 | Human.IL6 (F)          | GGTACATCCTCGACGGCATCT     |
|                      | Human.IL6 (R)          | GTGCCTCTTTGCTGCTTTCAC     |
| <b>Rat Primers</b>   |                        |                           |
| 64367                | Rat.PPIB (F)           | CAGGATTCATGTGCCAGGGT      |
|                      | Rat.PPIB (R)           | CCAAAGACCACATGCTTGCC      |
| 24481                | Rat.IFN- $\beta$ (F)   | GAGTCTTCACACTCCTGGC       |
|                      | Rat.IFN- $\beta$ (R)   | GTCCTTCAGGCATGAGACAG      |
| 298210               | Rat.IFN- $\alpha$ (F)  | GCGTTCCTGCTGTGCTTCTC      |
|                      | Rat.IFN- $\alpha$ (R)  | CCATTCAAGCTGCCTCAGGAGC    |
| 25712                | Rat.IFN- $\gamma$ (F)  | CGTCTTGGTTTTGCAGCTCT      |
|                      | Rat.IFN- $\gamma$ (R)  | CGTCCTTTTGCCAGTTCCTC      |
| 24599                | Rat. iNOS (F)          | GGTGAGGGGACTGGACTTTTAG    |
|                      | Rat. iNOS (R)          | TTGTTGGGCTGGGAATAGCA      |
| 245920               | Rat.IP10 (F)           | TCCACCTCCCTTTACCCAGT      |
|                      | Rat.IP10 (R)           | AGAGCTAGGAGAGCCGTCAT      |
| 24770                | Rat.MCP-1 (F)          | CAGGTCTCTGTACGCTTCTG      |
|                      | Rat.MCP-1 (R)          | GCCAGTGAATGAGTAGCAGCAG    |
| 25542                | Rat.MIP-1 $\alpha$ (F) | ACAAGCGCACCCCTCTGTTAC     |
|                      | Rat.MIP-1 $\alpha$ (R) | GGTCAGGAAAATGACACCCG      |



|                  |                         |                          |
|------------------|-------------------------|--------------------------|
| 24494            | Rat.IL-1 $\beta$ (F)    | GACTTCACCATGGAACCCGT     |
|                  | Rat.IL-1 $\beta$ (R)    | GGAGACTGCCCATTCCTCGAC    |
| 24835            | Rat.TNF- $\alpha$ (F)   | CGTCCCTCTCATACACTGG      |
|                  | Rat.TNF- $\alpha$ (R)   | CATGCTTTCCGTGCTCATG      |
| 59086            | Rat.TGF- $\beta$ (F)    | TGACGTCACTGGAGTTGTCC     |
|                  | Rat.TGF- $\beta$ (R)    | CCTCGACGTTTGGGACTGAT     |
| 25325            | Rat.IL-10 (F)           | CCTCTGGATACAGCTGCGAC     |
|                  | Rat.IL-10 (R)           | TGCCGGGTGGTTCAATTTTTC    |
| ChIP-PCR Primers |                         |                          |
|                  | Human.GAPDH (F)         | TACTAGCGGTTTTACGGGCG     |
|                  | Human.GAPDH (R)         | TCGAACAGGAGGAGCAGAGAGCGA |
|                  | Human.IL-6 (F)          | CGGTGAAGAATGGATGACCT     |
|                  | Human.IL-6 (R)          | AAACGAGACCCTTGCAACAAC    |
|                  | Human.TNF- $\alpha$ (F) | ATCAGTCAGTGGCCCAGAAGACCC |
|                  | Human.TNF- $\alpha$ (R) | CCACGTCCCGGATCATGCTTCAG  |
